# Supplementary material
Source: MDPI journal article supplement (https://www.mdpi.com/2227-7390/9/24/3323)
Supplement: s1 [file s1]

## Supplementary Materials

**Table S1. Supplementary material to Figure 2**—Digitized data for Patient 1

| TIME (days) | LOG HDV (IU/ml) | LOG HBV (IU/ml) |
|-------------|-----------------|-----------------|
| 0           | 5.74            | 4.47            |
| 2           | 5.25            | 4.08            |
| 7           | 5.12            | 4.42            |
| 28          | 4.71            | 4.57            |

**Table S2. Supplementary material to Figure 3**—Digitized data for Patient 2

| TIME (days) | LOG HDV (IU/ml) | LOG HBV (IU/ml) |
|-------------|-----------------|-----------------|
| 0           | 5.35            | 2.17            |
| 1           | 5.11            | 1.74            |
| 2           | 4.88            | 2.4             |
| 14          | 4.15            | 2.72            |
| 28          | 4.35            | 3.82            |
| 56          | 4.1             | 4.87            |
| 84          | 3.89            | 5.6             |
